# Supplementary material
Source: Springer Nature journal article supplement (https://www.springermedizin.de/resource/supplementary/12993_2010_327_MOESM1_ESM.pdf/9617546)

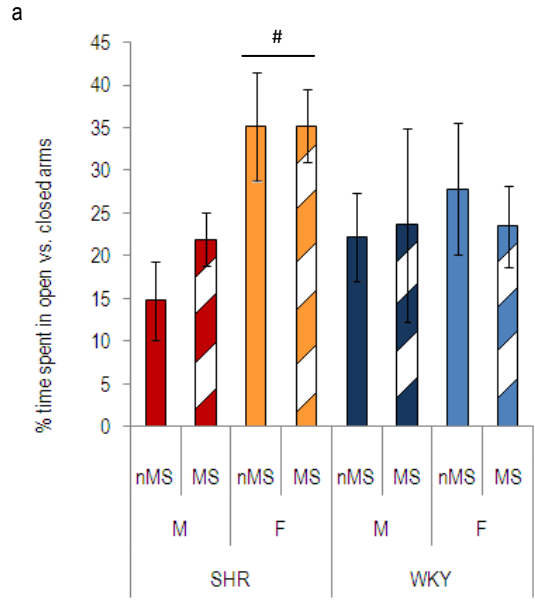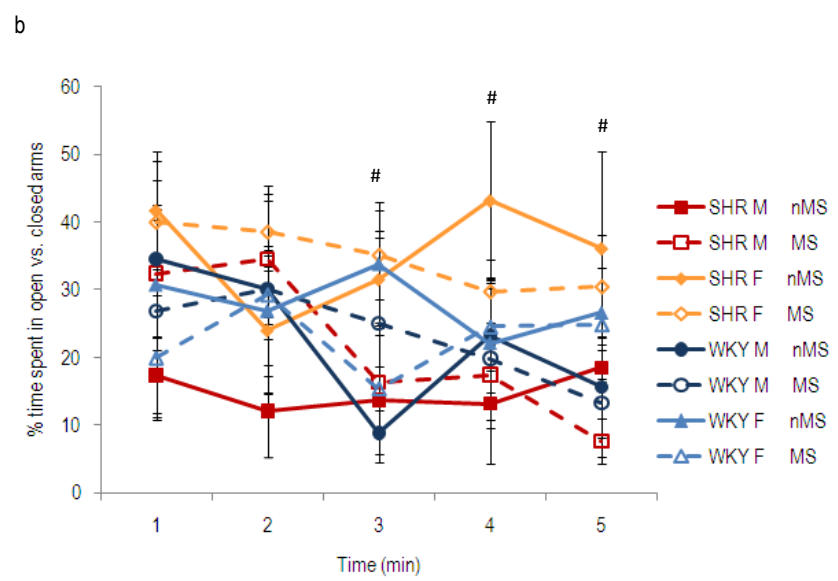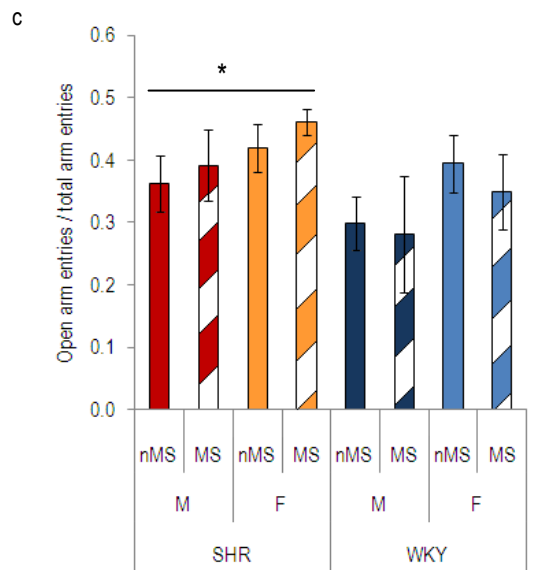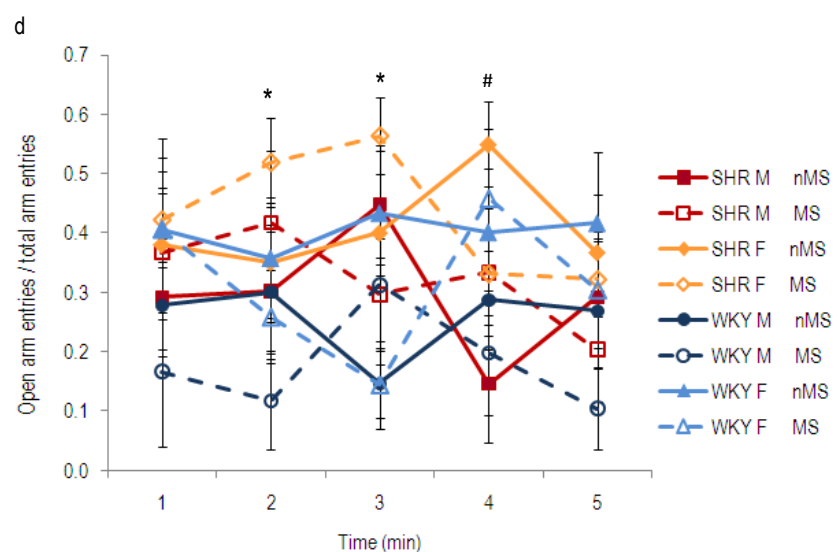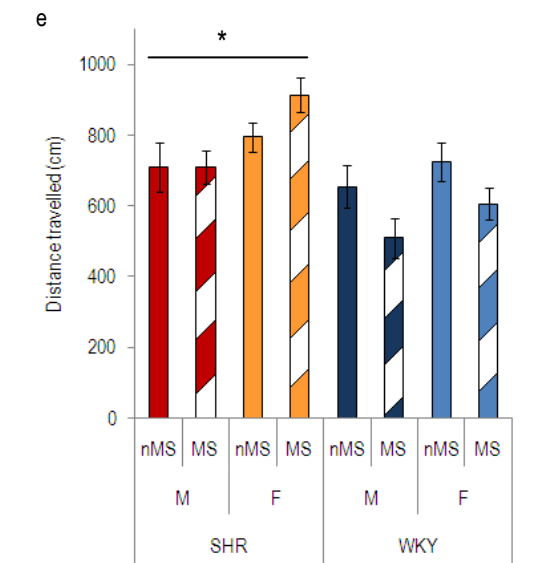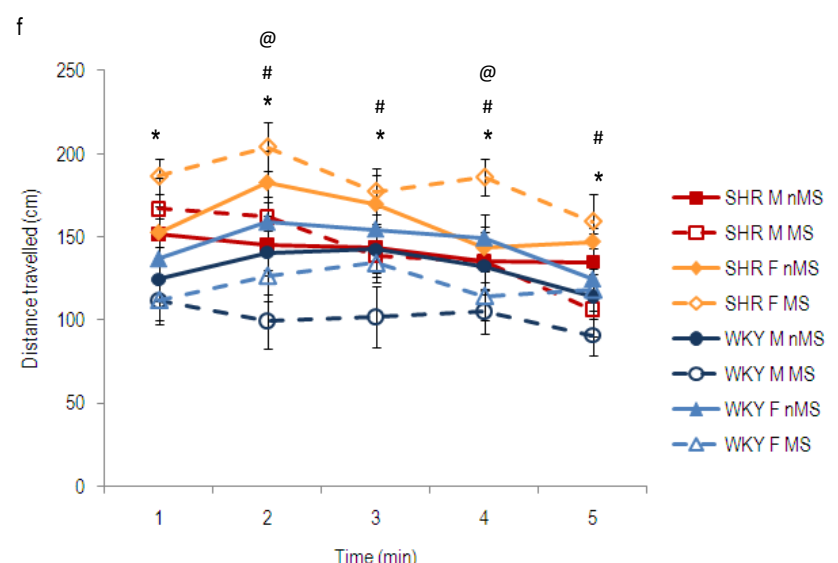

Supplement: MOESM1 [file 9617546]
